# Supplementary material
Source: Royal Society of Chemistry journal article supplement (doi:10.1039/d6tc00432f)
Supplement: d6tc00432f1.pdf [file d6tc00432f1.pdf]

## Disorder stabilisation of high pressure $\text{Mn}_{2-x}\text{Co}_x\text{ScSbO}_6$ double perovskites with complex magnetic properties

K. Ji,<sup>\*a,b</sup> F. Denis Romero,<sup>a</sup> C. Ritter,<sup>c</sup> J. Paul Attfield,<sup>b</sup> Y. Shimakawa<sup>a</sup>

a. Institute for Chemical Research, Kyoto University, Uji, Kyoto 611-0011, Japan.

b. Centre for Science at Extreme Conditions (CSEC) and School of Chemistry, University of Edinburgh, Edinburgh EH9 3FD, UK

c. Institute Laue-Langevin, 38042 Grenoble, France

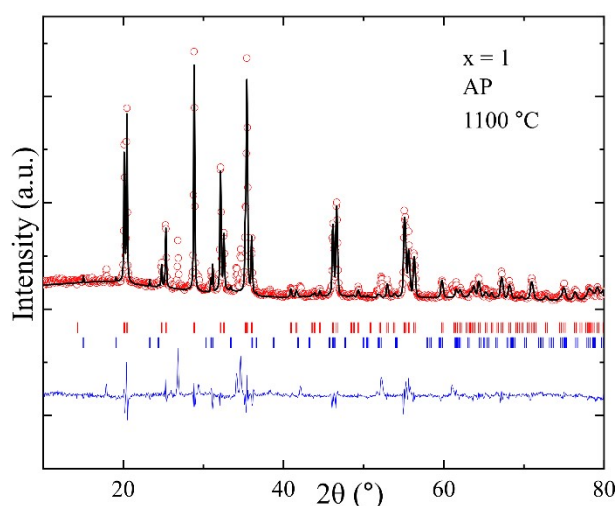

**Fig. S1** Rietveld fits of room temperature XRD data for  $x = 1$   $\text{MnCoScSbO}_6$  synthesised at  $1100\text{ °C}$  under AP. Data are fitted using a distorted  $\text{Mg}_3\text{TeO}_6$ -type structural model ( $R-3$ , red tick marks) with refined lattice parameters  $a = 8.8201(1)\text{ Å}$  and  $c = 10.5507(6)\text{ Å}$ . Blue tick marks refer to  $\text{Sc}_{5.5}\text{Sb}_{1.5}\text{O}_{12}$ . There are several unidentified impurity peaks.

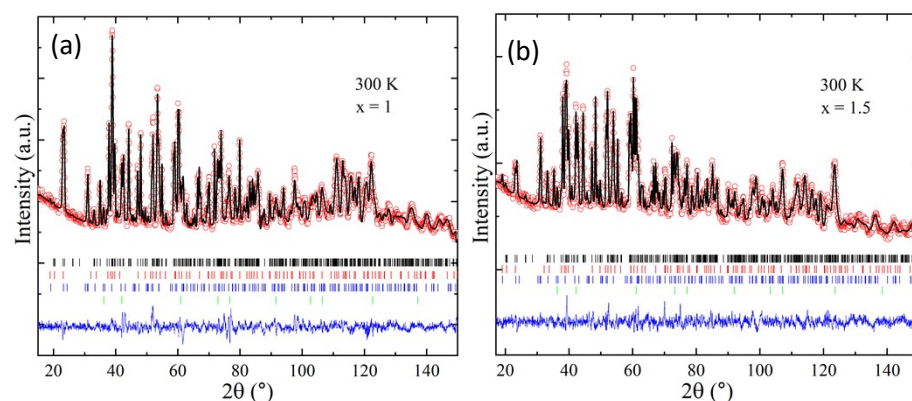

**Fig. S2** Rietveld fits of 300 K high resolution ( $\lambda = 1.54\text{ Å}$ ) NPD data for (a)  $x = 1$  (DPv: 77(1)%, NTO phase: 10(1)%,  $\text{Sc}_{5.5}\text{Sb}_{1.5}\text{O}_{12}$ : 9(1)% and (Mn/Co)O: 4(1)%) and (b)  $x = 1.5$  (DPv: 72(1)%, NTO phase: 11(1)%,  $\text{Sc}_{5.5}\text{Sb}_{1.5}\text{O}_{12}$ : 12(1)% and (Mn/Co)O: 5(1)%) are denoted by black, red, blue, and green tick marks, respectively.

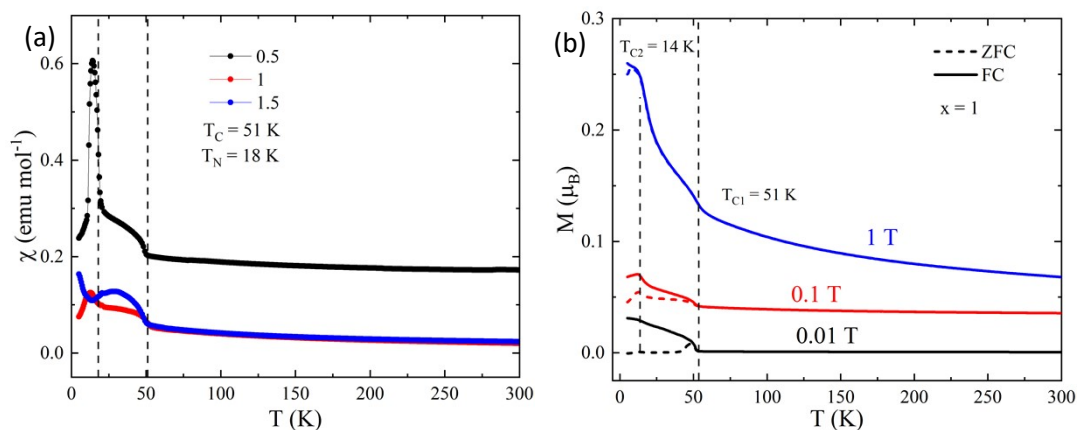

**Fig. S3** (a) ZFC-FC magnetic susceptibility of DPv  $x = 0.5, 1$  and  $1.5$  collected under  $0.1$  T. Magnetic transitions at  $51$  K and  $18$  K are observed. (c) Magnetic susceptibility measured under different applied magnetic fields for  $x = 1$ .

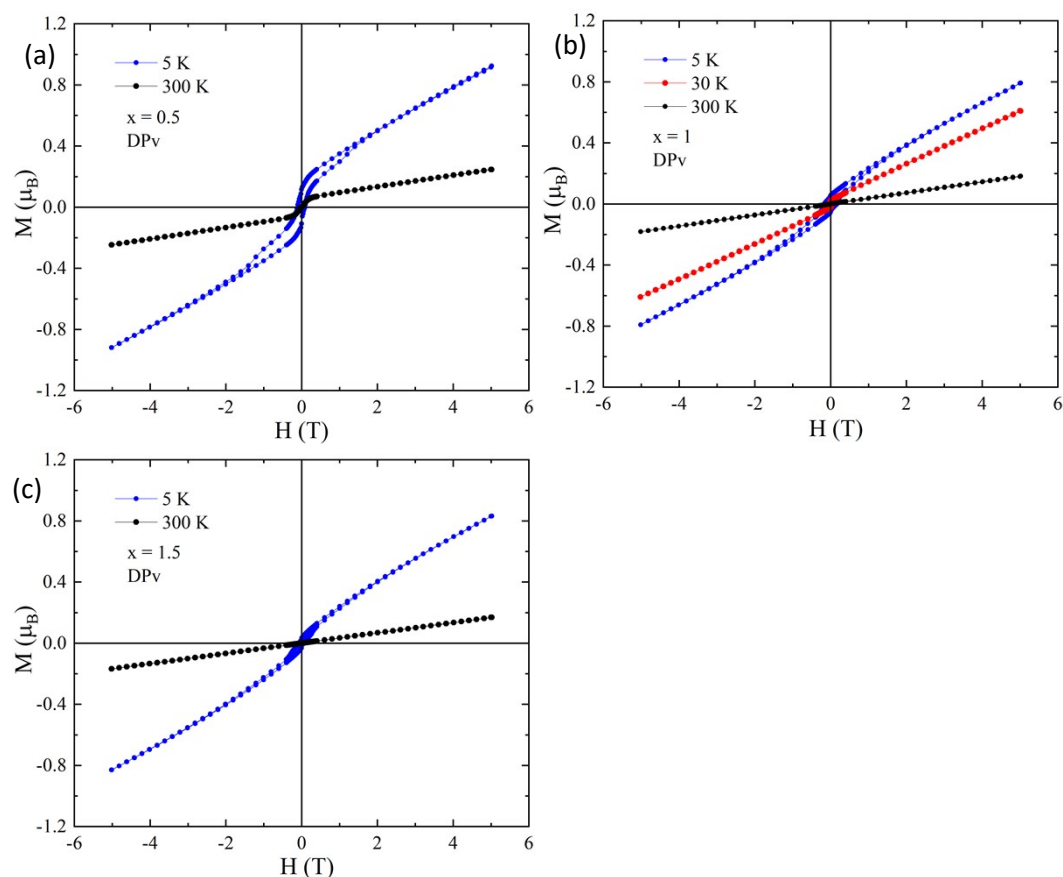

**Fig. S4** Magnetic hysteresis loops of (a)  $x = 0.5$ , (b)  $x = 1$  and (c)  $x = 1.5$  samples. Hysteresis loops for  $x = 0.5$  show a weak hysteric component at  $5$  K, whereas  $x = 1$  and  $1.5$  exhibit largely linear  $M-H$  behaviour consistent with glassy magnetic behaviour associated with spin freezing. The  $300$  K  $x = 0.5$   $M-H$  loop displays a weak ferromagnetic impurity contribution, whereas  $x = 1$  and  $1.5$   $300$  K loops show paramagnetic linear  $M-H$  correlation.

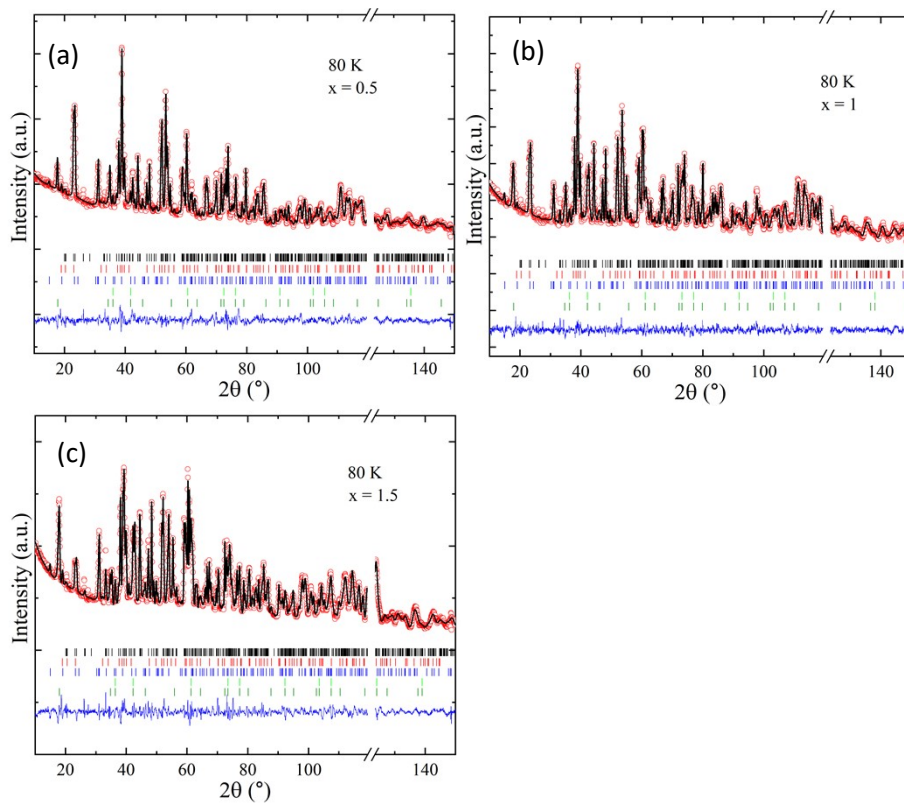

**Fig. S5** Rietveld fits of 80 K high resolution ( $\lambda = 1.54 \text{ \AA}$ ) NPD data for (a)  $x = 0.5$ , (b)  $x = 1$  and (c)  $x = 1.5$ . DPv, NTO phase,  $\text{Sc}_{5.5}\text{Sb}_{1.5}\text{O}_{12}$  and  $(\text{Mn}/\text{Co})\text{O}$  nuclear and magnetic are denoted by black, red, blue and green, dark green tick marks, respectively. The excluded region at  $2\theta \sim 120^\circ$  is due to an uncalibrated detector cell.

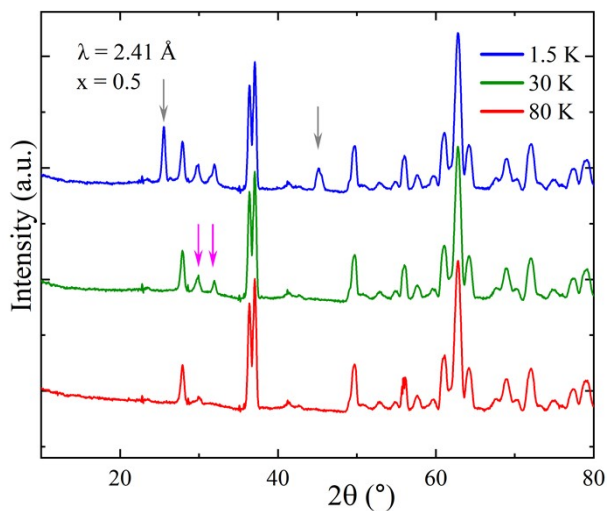

**Fig. S6** High flux NPD data ( $\lambda = 2.41 \text{ \AA}$ ) for  $x = 0.5$  collected at 1.5, 30 and 80 K. Magnetic intensities from DPv and NTO-type phases are denoted by grey and pink arrows.

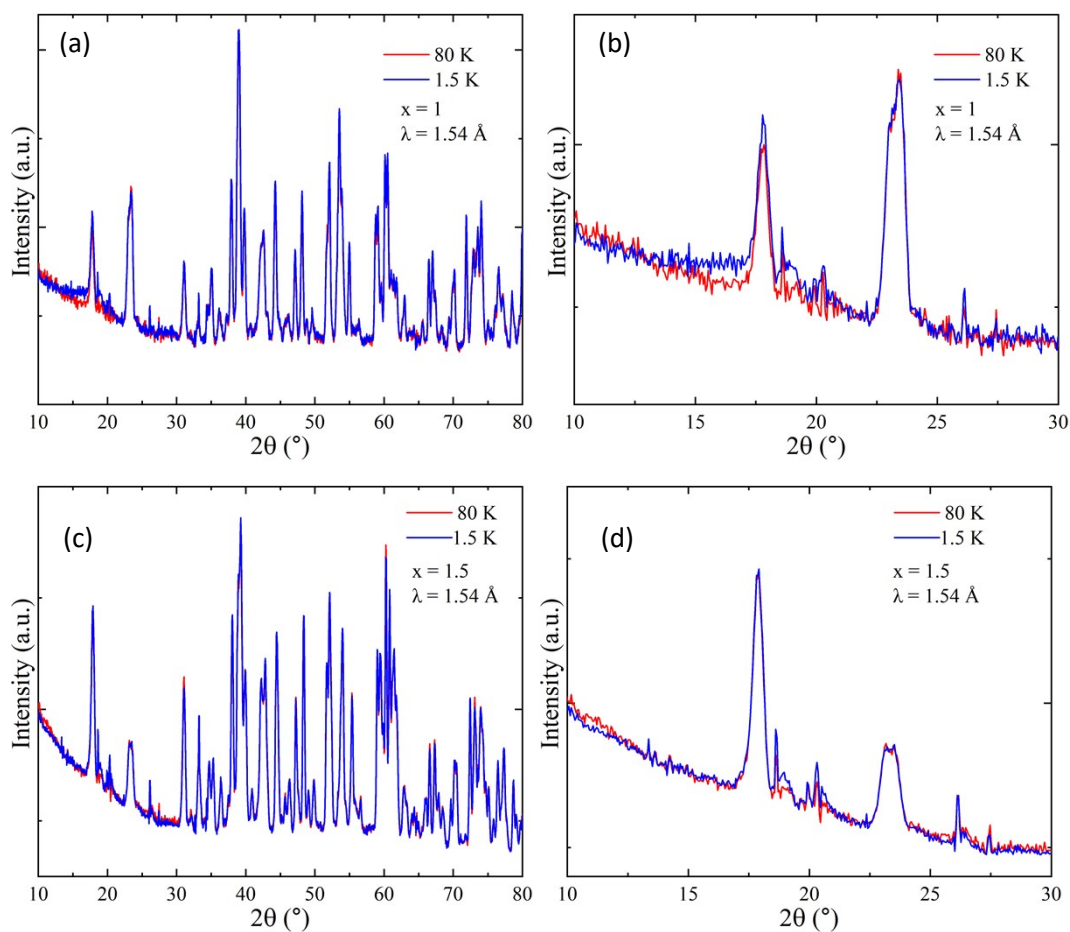

**Fig. S7** Comparison of 80 K and 1.5 K high resolution ( $\lambda = 1.54 \text{ \AA}$ ) NPD data of DPv (a)  $x = 1$ , (b) zoomed comparison of neutron diffraction data of  $x = 1$ , (c)  $x = 1.5$  and (d) zoomed comparison of neutron diffraction data of  $x = 1.5$ . A broad low-angle enhancement centred at around  $2\theta = 18^\circ$  is clearly observed in the zoomed  $x = 1$  data, consistent with short-range magnetic correlations.

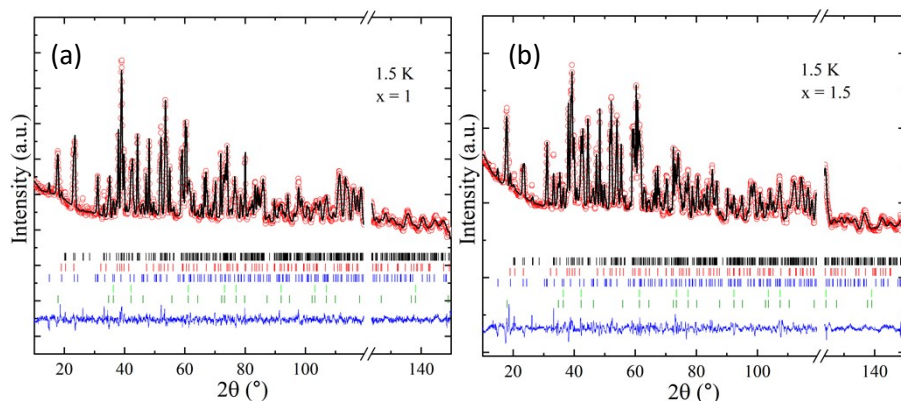

**Fig. S8** Rietveld fits of 1.5 K high resolution ( $\lambda = 1.54 \text{ \AA}$ ) NPD data for (a)  $x = 1$  and (b)  $x = 1.5$ . DPv, NTO phase are denoted by black and red tick marks. Secondary phases are denoted same as in Fig. S5.

**Table S1** Structural information for DPv Mn<sub>1.5</sub>Co<sub>0.5</sub>ScSbO<sub>6</sub> from the 300 K NPD Rietveld fit in monoclinic space group  $P2_1/n$ . Lattice parameters:  $a = 5.2803(3)$ ,  $b = 5.4443(3)$ ,  $c = 7.7222(4)$  Å and  $\beta = 90.285(4)^\circ$ .

| Atom/site | x        | y        | z        | Biso (Å <sup>2</sup> ) | Occupancy         |
|-----------|----------|----------|----------|------------------------|-------------------|
| Mn/Sc     | 0.014(3) | 0.115(2) | 0.724(2) | 0.45(1)                | 0.748(3)/0.252(3) |
| Sc/Co     | 0.50     | 0.00     | 0.00     | 0.45(1)                | 0.540(7)/0.460(7) |
| Sb        | 0.00     | 0.50     | 0.00     | 0.45(1)                | 1.0               |
| O1        | 0.314(1) | 0.328(1) | 0.940(1) | 1.1(1)                 | 1.0               |
| O2        | 0.329(1) | 0.303(1) | 0.578(1) | 1.1(1)                 | 1.0               |
| O3        | 0.875(7) | 0.432(7) | 0.760(6) | 1.1(1)                 | 1.0               |
| A-O1-A    | 103.9(8) | A-O2-A   | 104.7(5) | A-O3-A                 | 136.2(7)          |
| B-O1-B'   | 139.0(2) | B-O2-B'  | 135.3(2) | B-O3-B'                | 136.4(2)          |

Residuals are  $R_p = 1.65\%$ ,  $R_{wp} = 2.17\%$ ,  $R_{Bragg} = 7.29\%$ ,  $R_F = 4.15\%$ , and  $\chi^2 = 4.30$

**Table S2** Structural information for DPv MnCoScSbO<sub>6</sub> from the 300 K NPD Rietveld fit in monoclinic space group  $P2_1/n$ . Lattice parameters:  $a = 5.2653(3)$ ,  $b = 5.4155(2)$ ,  $c = 7.7026(4)$  Å and  $\beta = 90.410(3)^\circ$ .

| Atom/site | x        | y        | z        | Biso (Å <sup>2</sup> ) | Occupancy                 |
|-----------|----------|----------|----------|------------------------|---------------------------|
| Mn/Co/Sc  | 0.017(2) | 0.085(2) | 0.730(2) | 0.9(1)                 | 0.51(3)/0.214(7)/0.286(7) |
| Sc/Co     | 0.50     | 0.00     | 0.00     | 0.9(1)                 | 0.428(7)/0.572(7)         |
| Sb        | 0.00     | 0.50     | 0.00     | 0.9(1)                 | 1.0                       |
| O1        | 0.311(1) | 0.318(1) | 0.936(1) | 0.3 (1)                | 1.0                       |
| O2        | 0.323(1) | 0.308(1) | 0.571(1) | 0.3 (1)                | 1.0                       |
| O3        | 0.870(1) | 0.421(1) | 0.760(1) | 0.3 (1)                | 1.0                       |
| A-O1-A    | 102.1(5) | A-O2-A   | 103.3(4) | A-O3-A                 | 137.0(5)                  |
| B-O1-B'   | 139.8(4) | B-O2-B'  | 136.5(3) | B-O3-B'                | 135.1(3)                  |

Residuals are  $R_p = 2.05\%$ ,  $R_{wp} = 2.73\%$ ,  $R_{Bragg} = 8.61\%$ ,  $R_F = 5.49\%$ , and  $\chi^2 = 6.31$

**Table S3** Structural information for DPv Mn<sub>0.5</sub>Co<sub>1.5</sub>ScSbO<sub>6</sub> from the 300 K NPD Rietveld fit in monoclinic space group  $P2_1/n$ . Lattice parameters:  $a = 5.2521(2)$ ,  $b = 5.3808(2)$ ,  $c = 7.6857(3)$  Å and  $\beta = 90.571(3)^\circ$ .

| Atom/site | x        | y        | z        | Biso (Å <sup>2</sup> ) | Occupancy                 |
|-----------|----------|----------|----------|------------------------|---------------------------|
| Mn/Co/Sc  | 0.020(1) | 0.065(1) | 0.738(1) | 1.0(1)                 | 0.26(2)/0.435(4)/0.315(4) |
| Sc/Co     | 0.50     | 0.00     | 0.00     | 1.0(1)                 | 0.370(4)/0.630(4)         |
| Sb        | 0.00     | 0.50     | 0.00     | 1.0(1)                 | 1.0                       |
| O1        | 0.314(1) | 0.325(1) | 0.938(1) | 1.0(1)                 | 1.0                       |
| O2        | 0.330(1) | 0.308(1) | 0.577(1) | 1.0(1)                 | 1.0                       |
| O3        | 0.869(1) | 0.418(1) | 0.761(1) | 1.0(1)                 | 1.0                       |
| A-O1-A    | 105.3(4) | A-O2-A   | 104.3(3) | A-O3-A                 | 133.6(3)                  |
| B-O1-B'   | 138.6(3) | B-O2-B'  | 135.1(3) | B-O3-B'                | 133.9(3)                  |

Residuals are  $R_p = 1.86\%$ ,  $R_{wp} = 2.37\%$ ,  $R_{Bragg} = 7.43\%$ ,  $R_F = 4.40\%$ , and  $\chi^2 = 3.05$
